# Supplementary material
Source: Springer Nature journal article supplement (https://www.springermedizin.de/resource/supplementary/12891_2008_575_MOESM1_ESM.pdf/9511368)

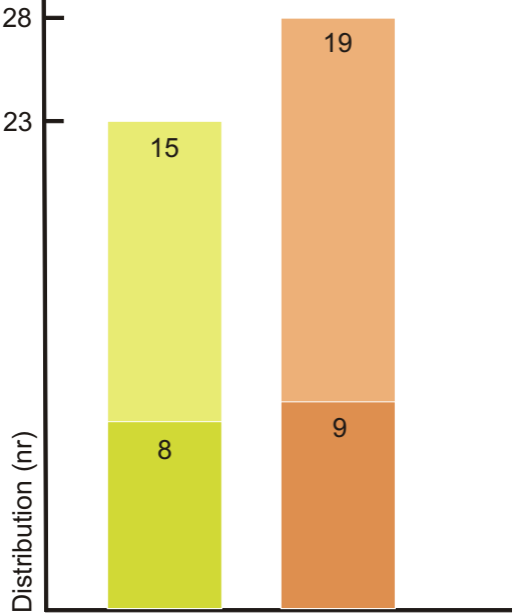

Spinal disease

- Severe type of MSCH
- Moderate type of MSCH
- Severe type of SC
- Moderate type of SC

Supplement: MOESM1 [file 9511368]
